# Supplementary material
Source: publisher site journal article supplement (https://www.spandidos-publications.com/4964/downloadSupplementary)

Figure S1. The transfection efficiency of the overexpressing plasmid and the expression of GPM6B after transfection. (A) Immunoblotting analysis of EGFP in WT, EV, OE (hGPM6B-EGFP) HEC1B or HEC108 cells. (B) Reverse transcription-quantitative PCR of the GPM6B mRNA level in EV, OE (hGPM6B-EGFP) HEC1B or HEC108 cells. EV, empty vector; GPM6B, neuronal membrane glycoprotein M6-b; OE, overexpressing; WT, wild type.

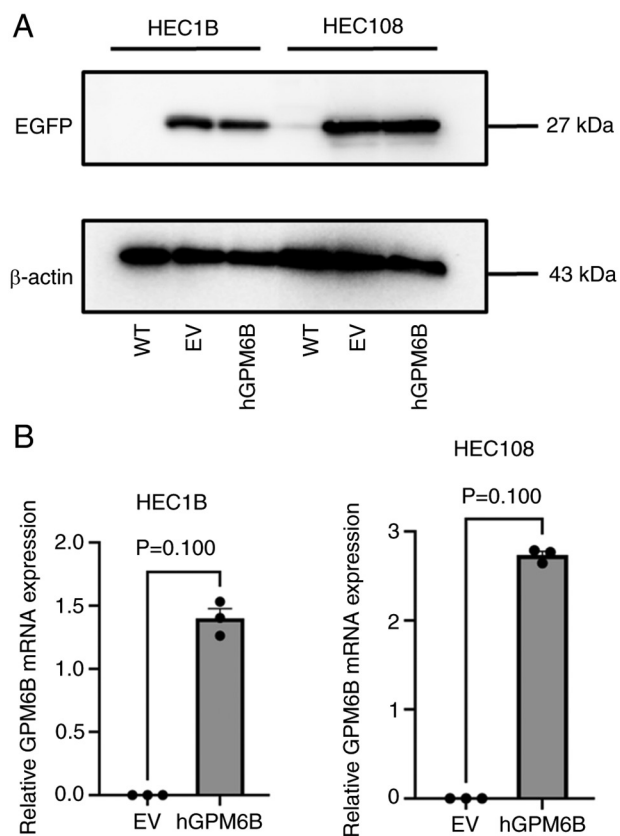

Supplement: Supplementary file 1 [file downloadSupplementary]
